# Supplementary material for: β-Ga2O3 Nanostructures: Chemical Vapor Deposition Growth Using Thermally Dewetted Au Nanoparticles as Catalyst and Characterization
Source: MDPI journal article supplement (doi:10.3390/nano12152589), 2022-07-28
Supplement: s1 [file s1]

# $\beta$ -Ga<sub>2</sub>O<sub>3</sub> Nanostructures: Chemical Vapor Deposition Growth Using Thermally Dewetted Au Nanoparticles as Catalyst and Characterization

Asha Yadav <sup>1</sup>, Bo Fu <sup>2</sup>, Stephanie Nicole Bonvicini <sup>1</sup>, Linh Quy Ly <sup>1</sup>, Zhitai Jia <sup>2</sup> and Yujun Shi <sup>1,\*</sup>

<sup>1</sup> Department of Chemistry, University of Calgary, Calgary, AB T2N 1N4, Canada; ashayadav@eee.sastra.edu (A.Y.); snbonvic@ucalgary.ca (S.N.B.); linh.ly2@ucalgary.ca (L.Q.L.)

<sup>2</sup> State Key Laboratory of Crystal Materials, Shandong University, Jinan 250100, China; 201712452@mail.sdu.edu.cn (B.F.); z.jia@sdu.edu.cn (Z.J.)

\* Correspondence: shiy@ucalgary.ca; Tel.: +1-403-2108674

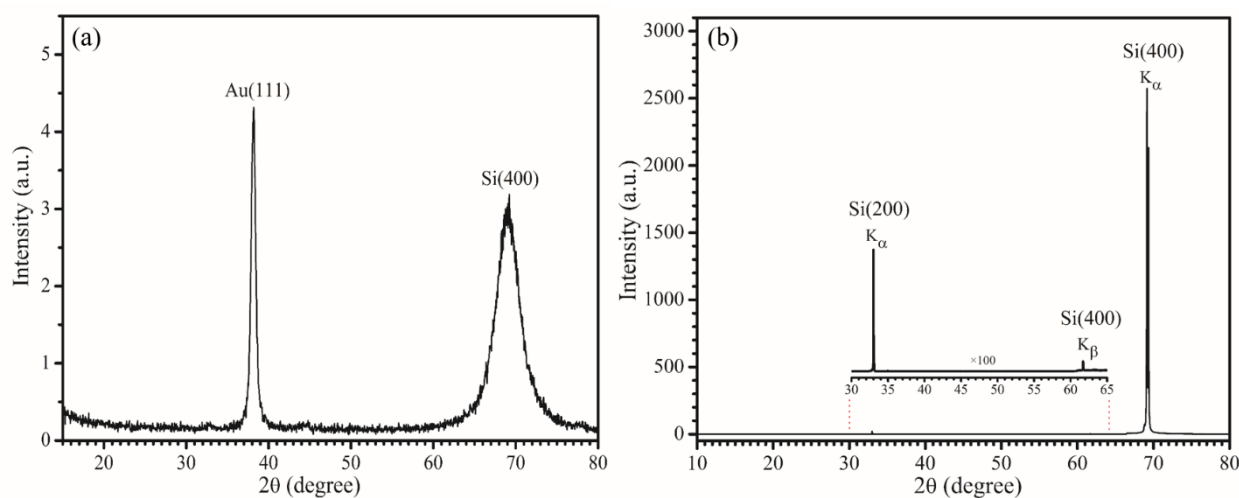

**Figure S1.** XRD patterns of (a) Au nanoparticles from thermal dewetting of a 2.9 nm thick Au thin film on a Si substrate, and (b) a blank Si (100) substrate. Peak assignments are based on ICDD No. 04-0784 for Au and No. 80-0018 for Si.

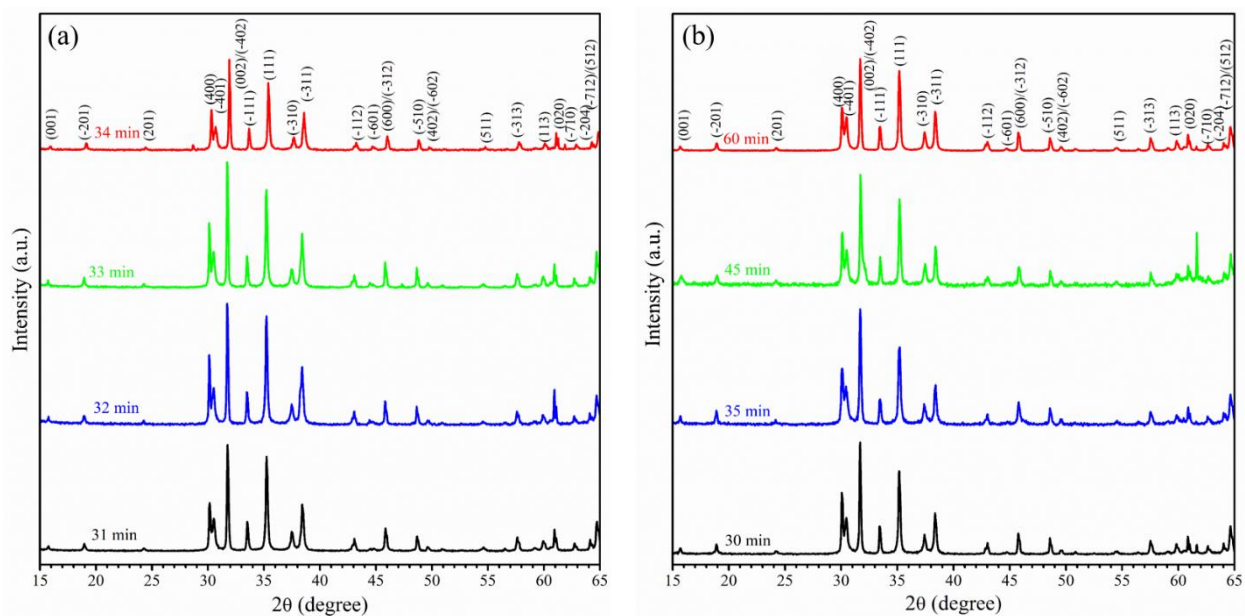

**Figure S2.** XRD patterns of  $\beta$ -Ga<sub>2</sub>O<sub>3</sub> nanostructures grown for various times of (a) 31–34 min at 1000 °C and (b) 30–60 min at 1100 °C under a constant Ar flow of 50 sccm.

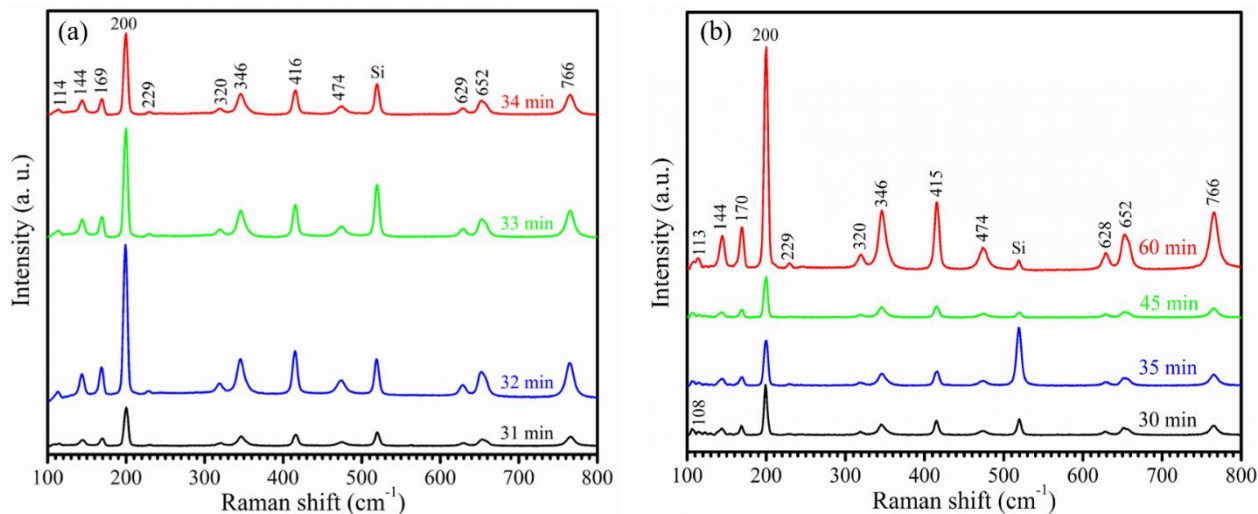

**Figure S3.** Room-temperature Raman spectra of  $\beta$ -Ga<sub>2</sub>O<sub>3</sub> nanostructures grown for various times of (a) 31–34 min at 1000 °C and (b) 30–60 min at 1100 °C under a constant Ar flow of 50 sccm.
